# Supplementary material for: Increased importance of aerosol–cloud interactions for surface PM 2.5 pollution relative to aerosol–radiation interactions in China with the anthropogenic emission reductions
Source: Copernicus journal article supplement (doi:10.5194/acp-23-14359-2023), 2023-11-20
Supplement: Supplementary file 1 [file acp-23-14359-2023-supplement.pdf]

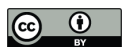

*Supplement of*

**Increased importance of aerosol–cloud interactions for surface PM<sub>2.5</sub> pollution relative to aerosol–radiation interactions in China with the anthropogenic emission reductions**

**Da Gao et al.**

*Correspondence to:* Bin Zhao (bzhao@mail.tsinghua.edu.cn)

The copyright of individual parts of the supplement might differ from the article licence.

## Section 1. The improvement for nitrate simulation

Before starting this work. We noted the poor ability of nitrate simulation in the WRF-Chem model. Previous studies reported that the nitrate underestimation might be attributed to the HONO underestimation (Wang et al., 2015; Xue et al., 2020). The source of HONO is originally from some gas-phase chemical reactions in the WRF-Chem, but other HONO sources are lacking, such as hydrolysis of NO<sub>2</sub> on humid aerosol surfaces and heterogeneous conversion of NO<sub>2</sub> on ground surfaces. It also has been confirmed that these reactions could occur in the atmosphere (Li et al., 2018, Liu et al., 2019). We added these four heterogeneous HONO reactions to the WRF-Chem model (Table S1). The addition of these four reactions enhances atmospheric oxidant and promotes OH radical formation, thereby promoting the formation of gaseous nitric acid through strong OH radicals reacting with NO<sub>2</sub>. In addition, the reactions of hydrolysis of NO<sub>2</sub> on humid aerosol surfaces contributed extra nitric acid. More nitric acid is beneficial for nitrate formation through condensation and heterogeneous reactions. Other specific information can be found in Zhang et al. (2021).

Table S1. Heterogeneous HONO reactions added in WRF-Chem (from Zhang et al., 2021).

| number | Reaction                                                                          | Reference          |
|--------|-----------------------------------------------------------------------------------|--------------------|
| (1)    | $\text{NO}_2 + \text{aerosol} = 0.5 \times \text{HONO} + 0.5 \times \text{HNO}_3$ | Liu et al., (2019) |

|     |                                                                                   |                                       |
|-----|-----------------------------------------------------------------------------------|---------------------------------------|
| (2) | $\text{NO}_2 + \text{aerosol} = 0.5 \times \text{HONO} + 0.5 \times \text{HNO}_3$ | Liu et al., (2019)                    |
| (3) | $\text{NO}_2 + \text{ground} = \text{HONO}$                                       | Li et al., (2018), Liu et al., (2019) |
| (4) | $\text{NO}_2 + \text{ground} + h\nu = \text{HONO}$                                | Liu et al., (2019)                    |

Table S2. Regional total emissions of gas and primary particulate matter in China in 2013 and 2021 and its decrease ratio from 2013 to 2021.

|                  | $\text{SO}_2$ | $\text{NO}_x$ | $\text{NH}_3$ | $\text{PM}_{2.5}$ | VOCs  |
|------------------|---------------|---------------|---------------|-------------------|-------|
| 2013 (unit: kt)  | 22402         | 27753         | 11040         | 12536             | 25330 |
| 2021 (unit: kt)  | 5640          | 15096         | 8847          | 6445              | 22398 |
| (2013-2021)/2013 | 75%           | 46%           | 20%           | 49%               | 12%   |

Table S3. Statistics for the simulation of meteorological factors in January and July of 2013 and 2021.

| Meteorological factors |              | OBS    | SIM    | Bias  |
|------------------------|--------------|--------|--------|-------|
| T2 (°C)                | January 2013 | 269.23 | 269.10 | -0.76 |
|                        | January 2021 | 270.56 | 269.97 | -0.59 |
|                        | July 2013    | 298.02 | 297.16 | -0.86 |
|                        | July 2021    | 298.55 | 297.65 | -0.90 |
| Q2 (g/kg)              | January 2013 | 2.47   | 2.38   | -0.09 |
|                        | January 2021 | 2.54   | 2.46   | -0.09 |
|                        | July 2013    | 14.86  | 14.71  | -0.15 |
|                        | July 2021    | 16.30  | 15.58  | -0.72 |
| WS10 (m/s)             | January 2013 | 2.38   | 3.31   | 0.94  |
|                        | January 2021 | 2.68   | 3.68   | 1.00  |
|                        | July 2013    | 2.62   | 3.62   | 1.00  |
|                        | July 2021    | 2.69   | 3.51   | 0.82  |
| WD10 (°)               | January 2013 | 275.99 | 282.83 | 10.27 |
|                        | January 2021 | 259.21 | 251.70 | 11.46 |
|                        | July 2013    | 192.27 | 183.08 | 4.86  |
|                        | July 2021    | 180.47 | 157.43 | 3.96  |

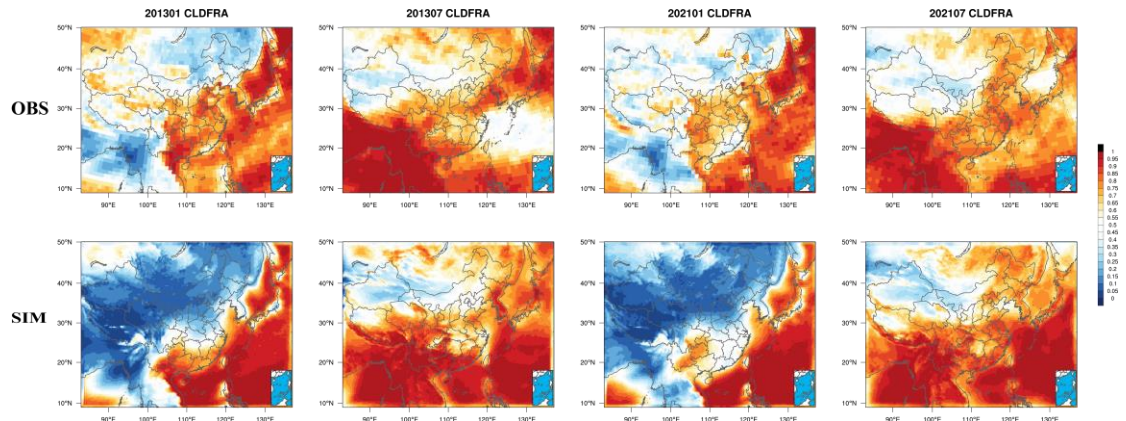

Fig. S1. Observation and simulation of cloud fraction in January and July of 2013 and 2021.

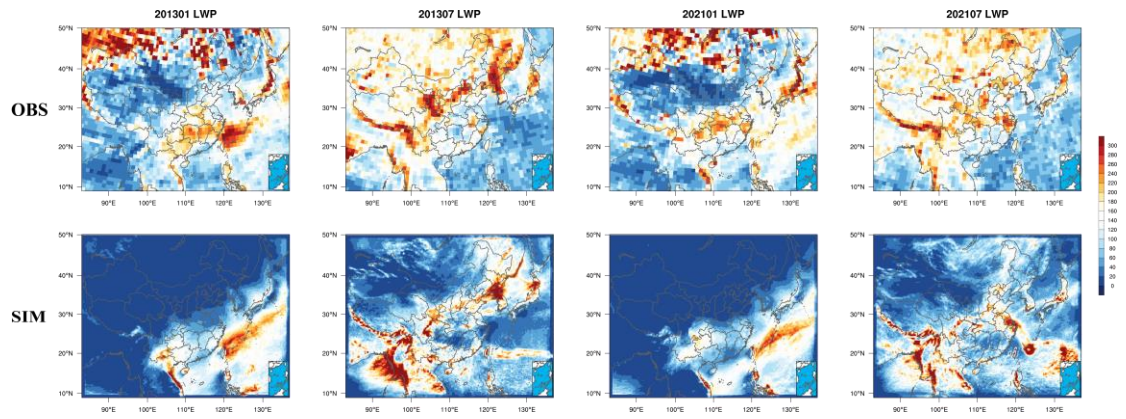

Fig. S2. Observation and simulation of liquid water path (unit:  $\text{g m}^{-2}$ ) in January and July of 2013 and 2021.

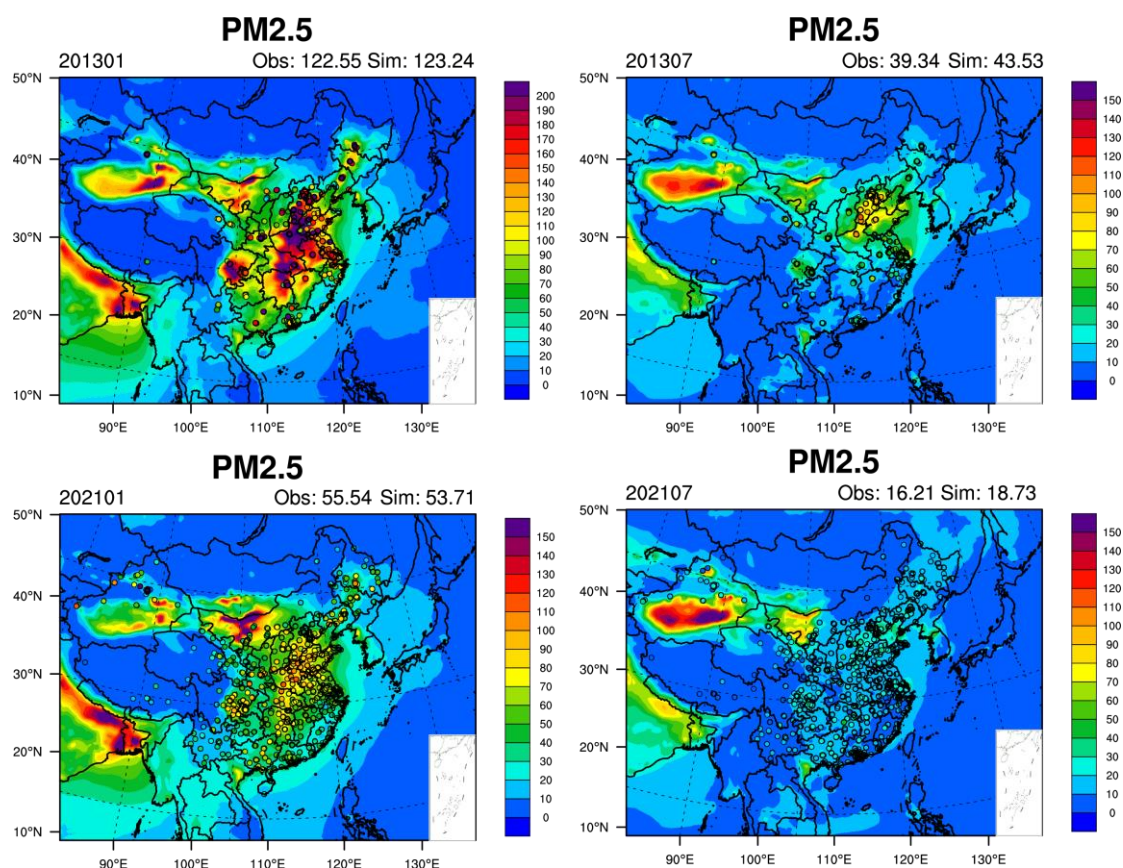

Fig. S3. Observation and simulation of surface PM<sub>2.5</sub> concentration (unit:  $\mu\text{g m}^{-3}$ ) in January and July of 2013 and 2021.

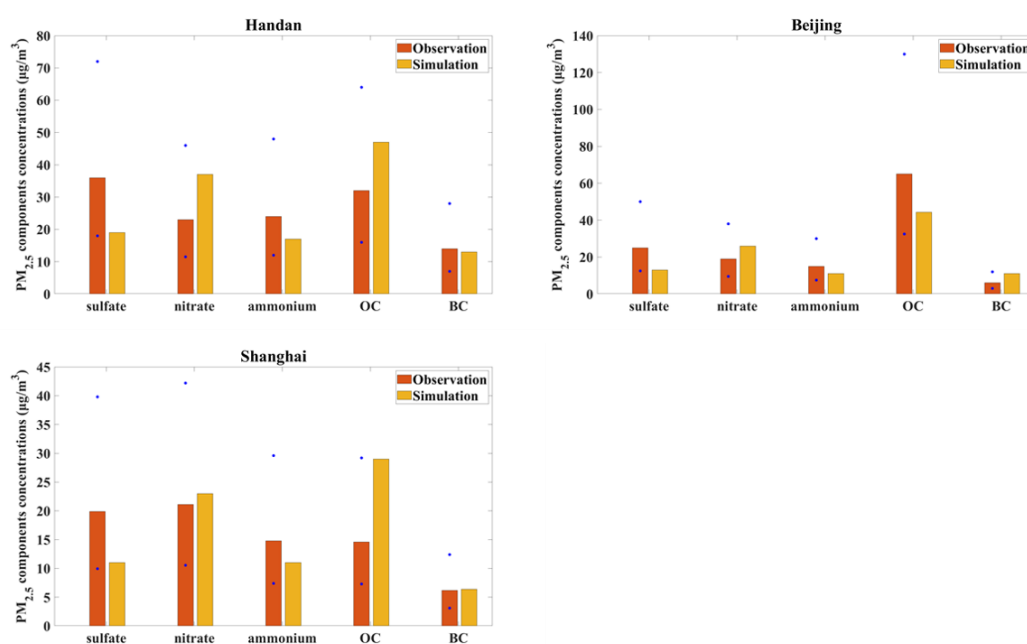

Fig. S4. Comparisons between PM<sub>2.5</sub> component observations and simulations in Handan, Beijing and Shanghai in January 2013. The blue points represent double or half of the PM<sub>2.5</sub> component observations. OC and BC represent organic aerosol and black carbon.

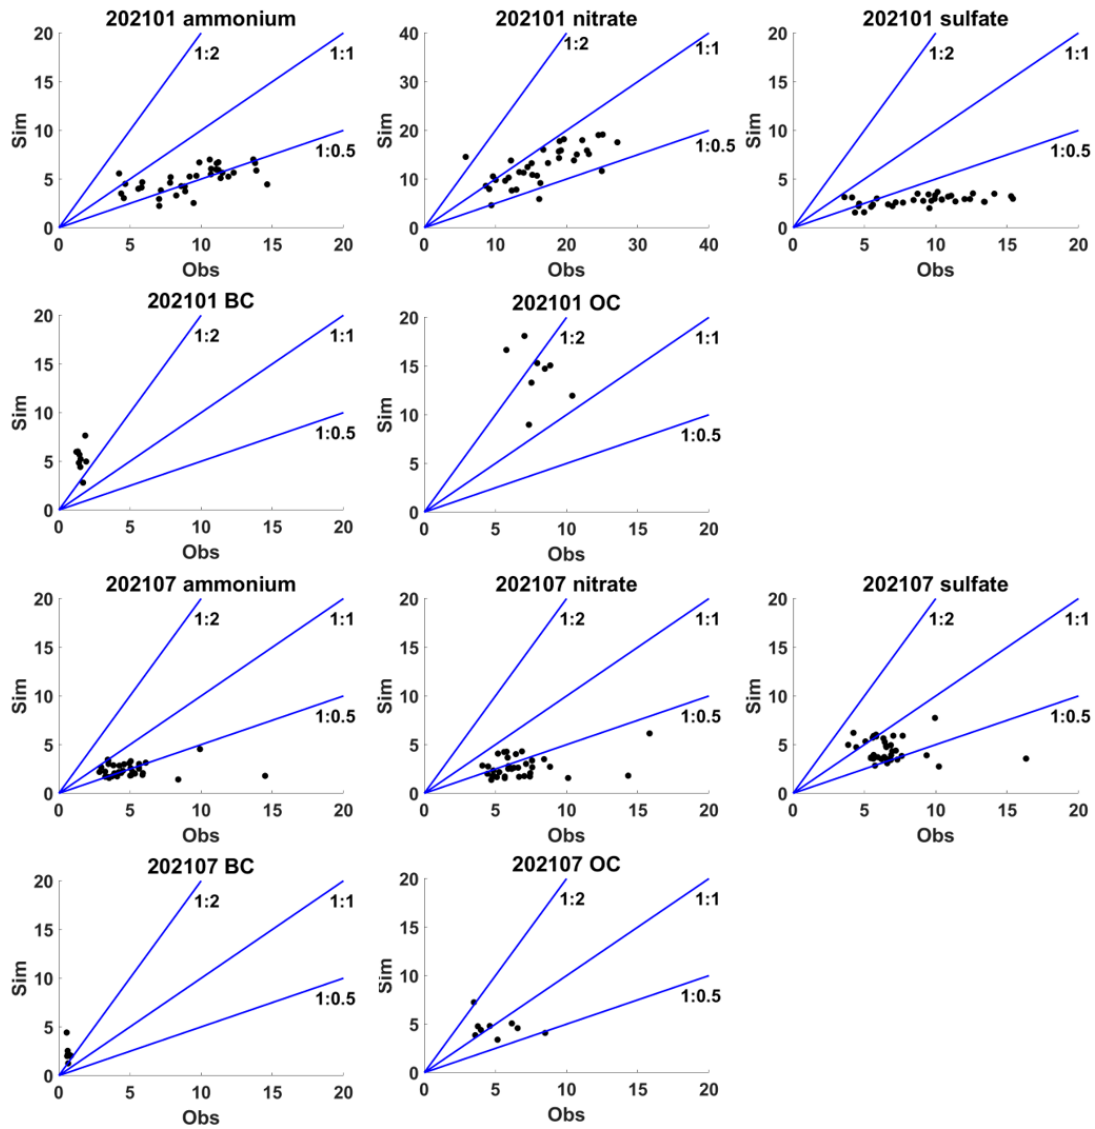

Fig. S5. The ratios of simulation to observation of ammonium, nitrate, sulfate, BC and OC (unit:  $\mu\text{g m}^{-3}$ ) in January and July 2021.

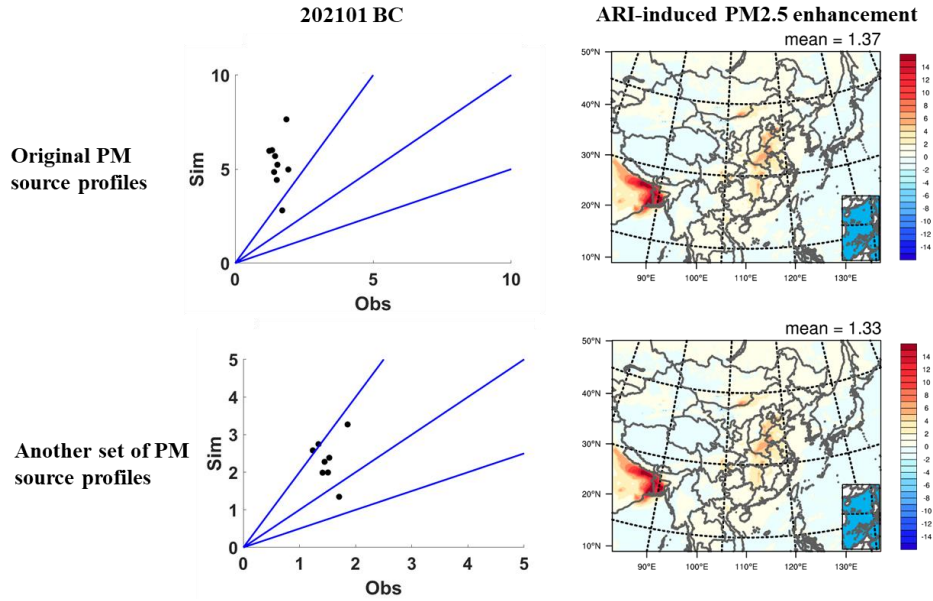

Fig. S6. The ratios of simulation to observation of BC and ARI-induced PM<sub>2.5</sub> enhancement (unit:  $\mu\text{g m}^{-3}$ ) obtained from original PM source profiles and another set of PM source profiles in January 2021.

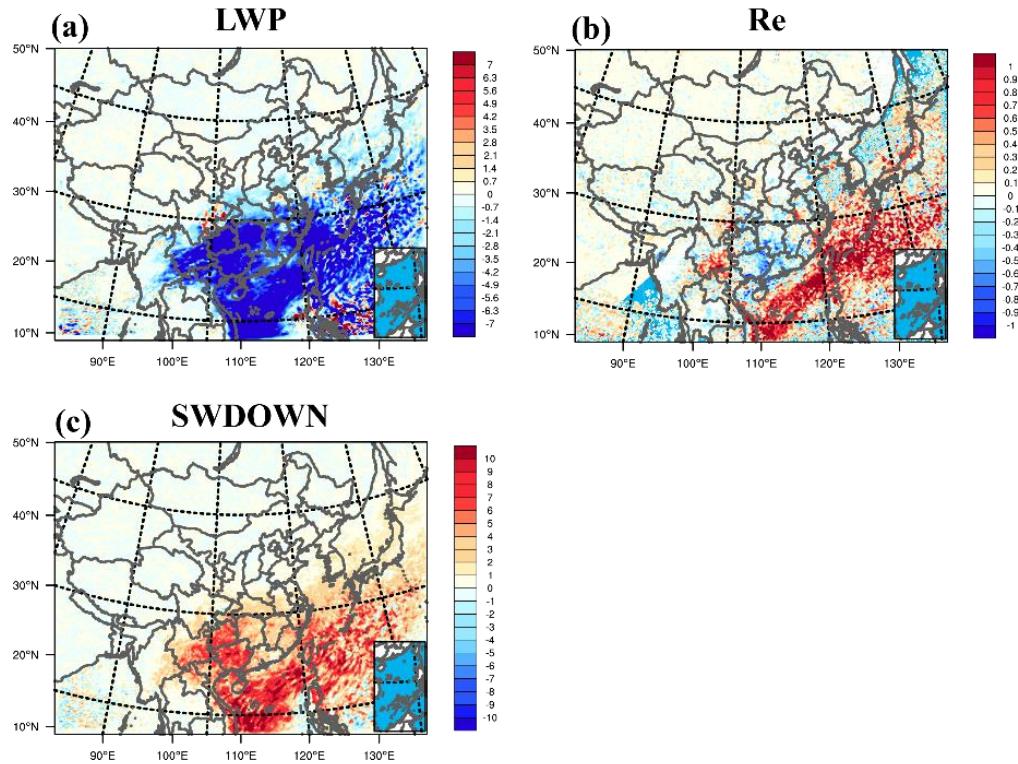

Fig. S7. Change in aerosol-induced liquid water path (LWP) (unit:  $\text{g m}^{-2}$ ),

Re (unit:  $\mu\text{m}$ ) and ACI-induced downward shortwave radiation at the surface (SWDOWN) reduction (unit:  $\text{W m}^{-2}$ ) in January owing to the emission reduction from 2013 to 2021.

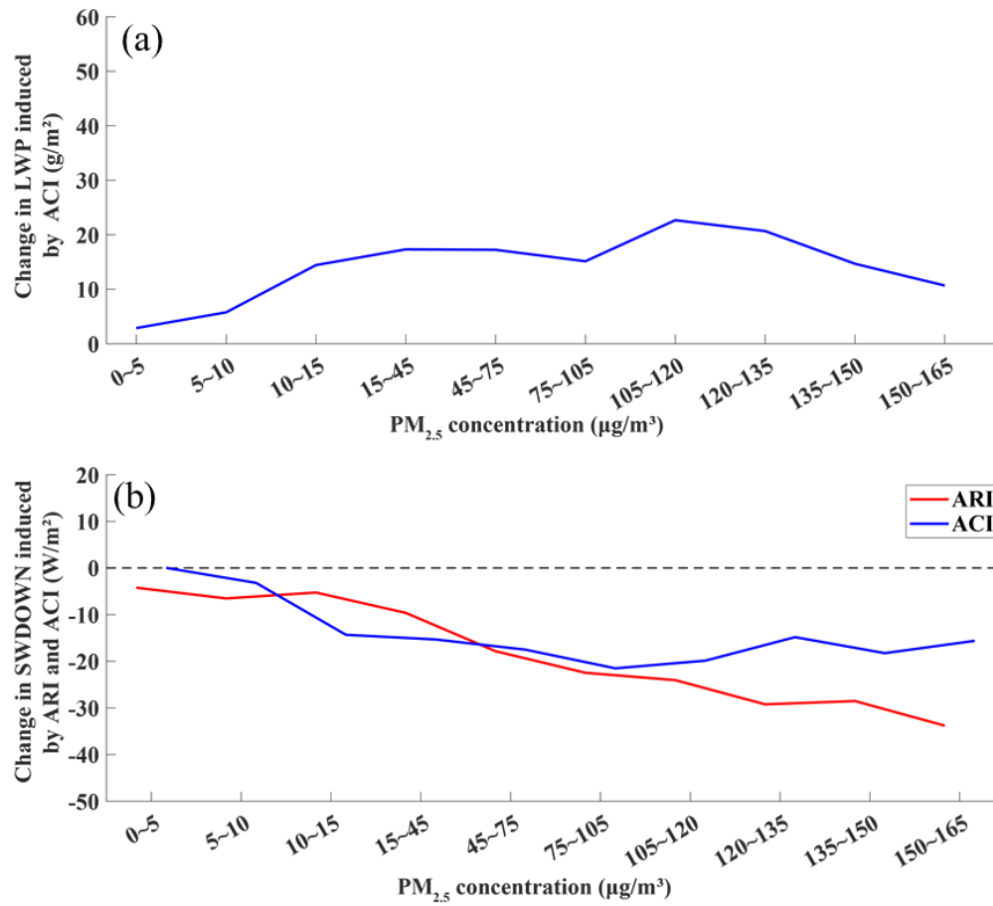

Fig. S8. Change in LWP induced by ACI and SWDOWN induced by ARI and ACI at different  $\text{PM}_{2.5}$  levels.

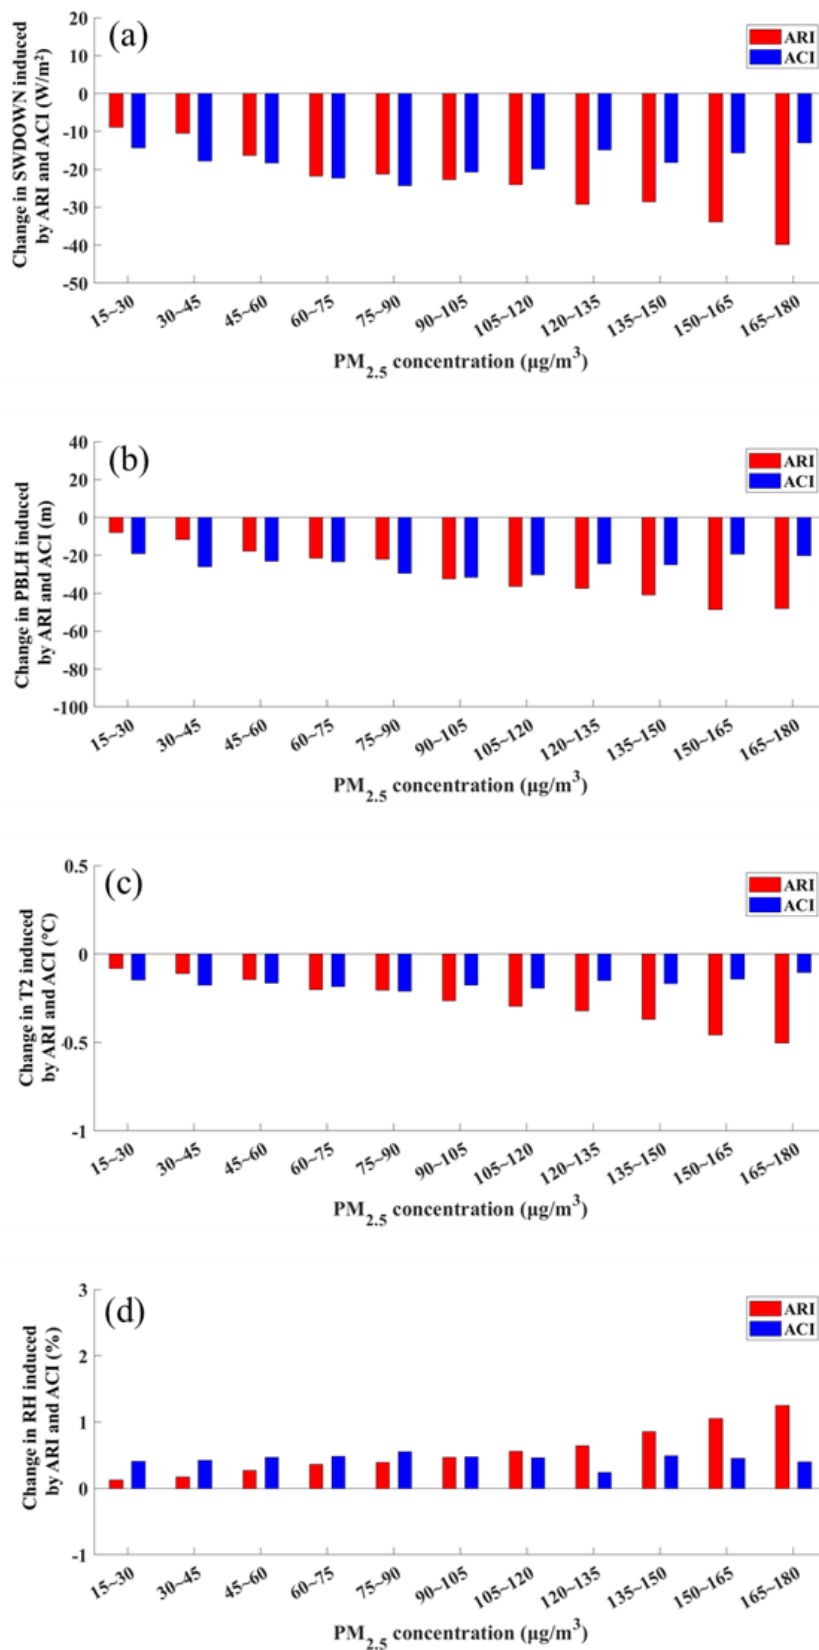

66

67 Fig. S9. Change in (a) SWDOWN, (b) planetary boundary layer height

68 (PBLH), (c) air temperature at 2 m (T2), and (d) relative humidity (RH)

induced by ARI and ACI at different ambient PM<sub>2.5</sub> levels. These data are from the simulations for January and July in the experiments of 21M13E and 21M21E.

## References

Li, D. D., Xue, L. K., Wen, L., Wang, X. F., Chen, T. S., Mellouki, A., Chen, J. M., and Wang, W. X.: Characteristics and sources of nitrous acid in an urban atmosphere of northern China: Results from 1-yr continuous observations, *Atmos Environ*, 182, 296-306, 10.1016/j.atmosenv.2018.03.033, 2018.

Liu, Y. H., Lu, K. D., Li, X., Dong, H. B., Tan, Z. F., Wang, H. C., Zou, Q., Wu, Y. S., Zeng, L. M., Hu, M., Min, K. E., Kecorius, S., Wiedensohler, A., and Zhang, Y. H.: A Comprehensive Model Test of the HONO Sources Constrained to Field Measurements at Rural North China Plain, *Environ Sci Technol*, 53, 3517-3525, 10.1021/acs.est.8b06367, 2019.

Wang, L. W., Wen, L., Xu, C. H., Chen, J. M., Wang, X. F., Yang, L. X., Wang, W. X., Yang, X., Sui, X., Yao, L., and Zhang, Q. Z.: HONO and its potential source particulate nitrite at an urban site in North China during the cold season, *Sci Total Environ*, 538, 93-101, 10.1016/j.scitotenv.2015.08.032, 2015.

Xue, C. Y., Zhang, C. L., Ye, C., Liu, P. F., Catoire, V., Krysztofiak, G.,

91       Chen, H., Ren, Y. G., Zhao, X. X., Wang, J. H., Zhang, F., Zhang, C.  
92       X., Zhang, J. W., An, J. L., Wang, T., Chen, J. M., Kleffmann, J.,  
93       Mellouki, A., and Mu, Y. J.: HONO Budget and Its Role in Nitrate  
94       Formation in the Rural North China Plain, *Environ Sci Technol*, 54,  
95       11048-11057, 10.1021/acs.est.0c01832, 2020.

96       Zhang, S. P., Sarwar, G., Xing, J., Chu, B. W., Xue, C. Y., Sarav, A., Ding,  
97       D. A., Zheng, H. T., Mu, Y. J., Duan, F. K., Ma, T., and He, H.:  
98       Improving the representation of HONO chemistry in CMAQ and  
99       examining its impact on haze over China, *Atmos Chem Phys*, 21,  
100       15809-15826, 10.5194/acp-21-15809-2021, 2021.

101
